# Supplementary material for: Cathodic electrodeposition of amorphous tungsten oxide dihydrate film for dual-band electrochromic modulation
Source: Royal Society of Chemistry journal article supplement (doi:10.1039/d4ra08851d), 2025-01-01
Supplement: d4ra08851d1.pdf [file d4ra08851d1.pdf]

## Supplementary Information

Table S1 Performance parameters of the amorphous  $\text{WO}_3 \cdot 2\text{H}_2\text{O}$  film compared with those of  $\text{WO}_3$  hydrate films reported in the literature

| Material                                                                                      | $\Delta T$                        | Operation potential (V)                 | $t_c/t_b$ (s)                            | CE ( $\text{cm}^2/\text{C}$ )                                                  | Cycling stability                                                                                                                              |
|-----------------------------------------------------------------------------------------------|-----------------------------------|-----------------------------------------|------------------------------------------|--------------------------------------------------------------------------------|------------------------------------------------------------------------------------------------------------------------------------------------|
| Crystalline $\text{WO}_3 \cdot \text{H}_2\text{O}$ Film [1]                                   | 59% at 1200 nm, 13% at 550 nm     | 1.6~4.0 (vs. $\text{Li}/\text{Li}^+$ )  | -                                        | 96.2 at 1200 nm, 20.7 at 550 nm                                                | -                                                                                                                                              |
| Crystalline $\text{WO}_3 \cdot 2\text{H}_2\text{O}$ nanoplate film [2]                        | 90.4% at 1600 nm                  | -0.2~0.4 (vs. $\text{Ag}/\text{AgCl}$ ) | -                                        | 322.6 at 1600 nm                                                               | Retaining 93.7% of $\Delta T$ after 500 cycles                                                                                                 |
| Amorphous $\text{WO}_3 \cdot 0.9\text{H}_2\text{O}$ film [3]                                  | 69% at 1100 nm, 24% at 550 nm     | -0.8~0.8 (vs. $\text{Ag}/\text{AgCl}$ ) | 2.3/2.1 at 1100 nm                       | 312 at 1100 nm                                                                 | Retaining 97% of $\Delta T$ after 12000 cycles at 1100 nm; retaining 87% after 1000 cycles at 550 nm                                           |
| Amorphous and crystalline Ti-doped $\text{WO}_3 \cdot 2\text{H}_2\text{O}$ film [4]           | 83.8% at 633 nm, 72.5% at 1050 nm | -0.5~0.5 (vs. $\text{Ag}/\text{AgCl}$ ) | 15.3/14.9 at 633 nm, 3.5/16.0 at 1050 nm | 22.8 at 633 nm, 90.8 at 1050 nm                                                | Retaining 52.3% of $\Delta T$ at 633 nm and 26% at 1050 nm after 500 cycles                                                                    |
| Crystalline $\text{WO}_3 \cdot \text{H}_2\text{O}$ nanoplates film [5]                        | 58% at 633 nm                     | -1~3 (vs. $\text{Ag}/\text{AgCl}$ )     | 9.6/5.1                                  | 38.2                                                                           | -                                                                                                                                              |
| $\text{WO}_2(\text{O}_2)\text{H}_2\text{O} \cdot 1.66\text{H}_2\text{O}$ nanocrystal film [6] | 32% at 632 nm                     | -1.5~0.5 (vs. $\text{Ag}/\text{AgCl}$ ) | 7.8/1.7                                  | 5.74                                                                           | -                                                                                                                                              |
| $3\text{WO}_3 \cdot \text{H}_2\text{O}$ nanoplate film [7]                                    | 38% at 633nm                      | -0.3~0.3 (vs. $\text{Ag}/\text{AgCl}$ ) | 4.3/1.4                                  | 112.7                                                                          | -                                                                                                                                              |
| Amorphous $\text{WO}_3 \cdot 2\text{H}_2\text{O}$ film (this work)                            | 92% at 633 nm and 86% at 1100 nm  | -0.5~0.5 (vs. $\text{Ag}/\text{AgCl}$ ) | 18.1/17.5 at 633 nm, 7.1/5.0 at 1100 nm  | 204.2 $\text{cm}^2/\text{C}$ at 1100 nm, 72.3 $\text{cm}^2/\text{C}$ at 633 nm | retaining 94% of $\Delta T$ after 2000 cycles and 76% after 10000 cycles at 633 nm; retaining 18% of $\Delta T$ after 10000 cycles at 1100 nm. |

- [1] J. Fortunato, B.Z. Zydlewski, M. Lei, N.P. Holzapfel, M. Chagnot, J.B. Mitchell, H. Lu, D. Jiang, D.J. Milliron, V. Augustyn. Dual-band electrochromism in hydrous tungsten oxide, *ACS Photonics*, 10 (2023) 3409-3418.
- [2] Z. Wang, W. Gong, X. Wang, Z. Chen, X. Chen, J. Chen, H. Sun, G. Song, S. Cong, F. Geng, Z. Zhao. Remarkable near-infrared electrochromism in tungsten oxide driven by interlayer water-induced battery-to-pseudocapacitor transition. *ACS Appl. Mater. Interfaces*, 12 (2020) 33917-33925.
- [3] W. Zhao, J. Wang, B. Tam, H. Zhang, F. Li, A. Du, W. Cheng. Structural water in amorphous tungsten oxide hydrate enables fast and ultrastable regulation of near-infrared light transmittance, *Adv. Opt. Mater.*, 11 (2023) 2202774.
- [4] X. Sun, D. Wang, W. Wu, X. Zhao, Z. Zhang, B. Wang, X. Rong, G. Wu, X. Wang. Amorphous and crystalline Ti-doped  $\text{WO}_3 \cdot 2\text{H}_2\text{O}$  for dual-band electrochromic smart windows, *ACS Sustain. Chem. Eng.*, 12 (2024) 5459-5467.
- [5] C.Y. Ng, K.A. Razak, Z. Lockman. Effect of annealing on acid-treated  $\text{WO}_3 \cdot \text{H}_2\text{O}$  nanoplates and their electrochromic properties, *Electrochim. Acta*, 178 (2015) 673-681.
- [6] S. Wang, K. Dou, Y. Zou, Y. Dong, J. Li, D. Ju, H. Zeng. Assembling tungsten oxide hydrate nanocrystal colloids formed by laser ablation in liquid into fast-response electrochromic films, *J. Colloid Interf. Sci.*, 489 (2017) 85-91.
- [7] Z. Jiao, X. Wang, J. Wang, L. Ke, H.V. Kemir, T. W. Koh, X. Sun. Efficient synthesis of plate-like crystalline hydrated tungsten trioxide thin films with highly improved electrochromic performance, *Chem. Commun.*, 48 (2012) 365-367.
